# Supplementary material for: Studying the Mechanism of Interaction of Doxofylline with Human Lysozyme: A Biophysical and In Silico Approach
Source: MDPI journal article supplement (doi:10.3390/molecules28083462), 2023-04-14
Supplement: s1 [file s1]

# Studying the mechanism of interaction of doxofylline with human lysozyme: A biophysical and in silico approach

Suliman Yousef Alomar

*Zoology Department, College of Science, King Saud University, Riyadh-11451, Kingdom of Saudi Arabia.*

## Supplementary Figures

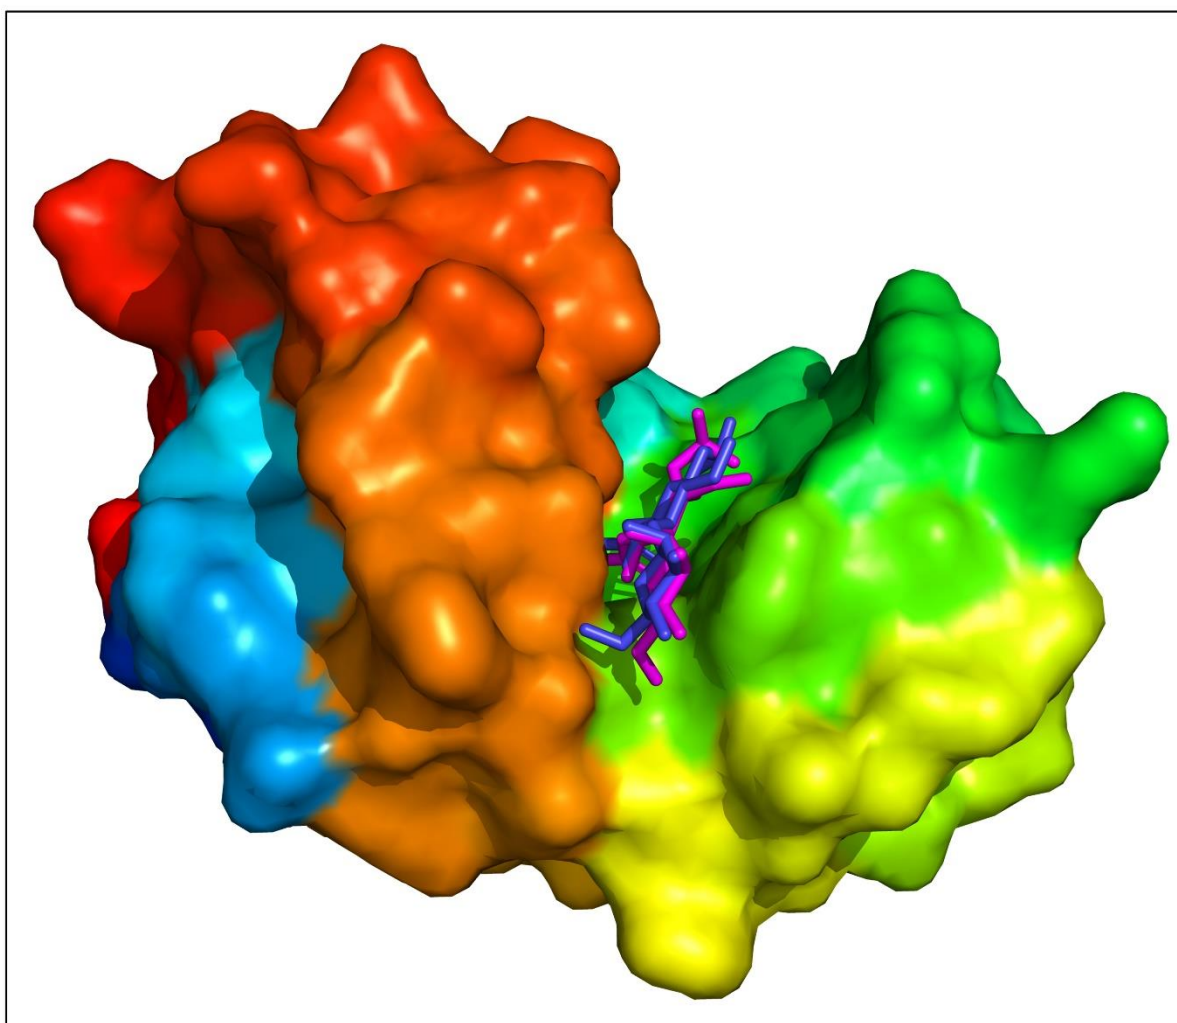

**Supplementary Figure S1.** Overlap of the docked molecule of lysozyme substrate with the original complex. The substrate occupied same binding site with approximately similar orientation validating the docking procedure. The original substrate is shown as blue sticks, the docked substrate is shown as magenta sticks, protein is shown as coloured surface view.

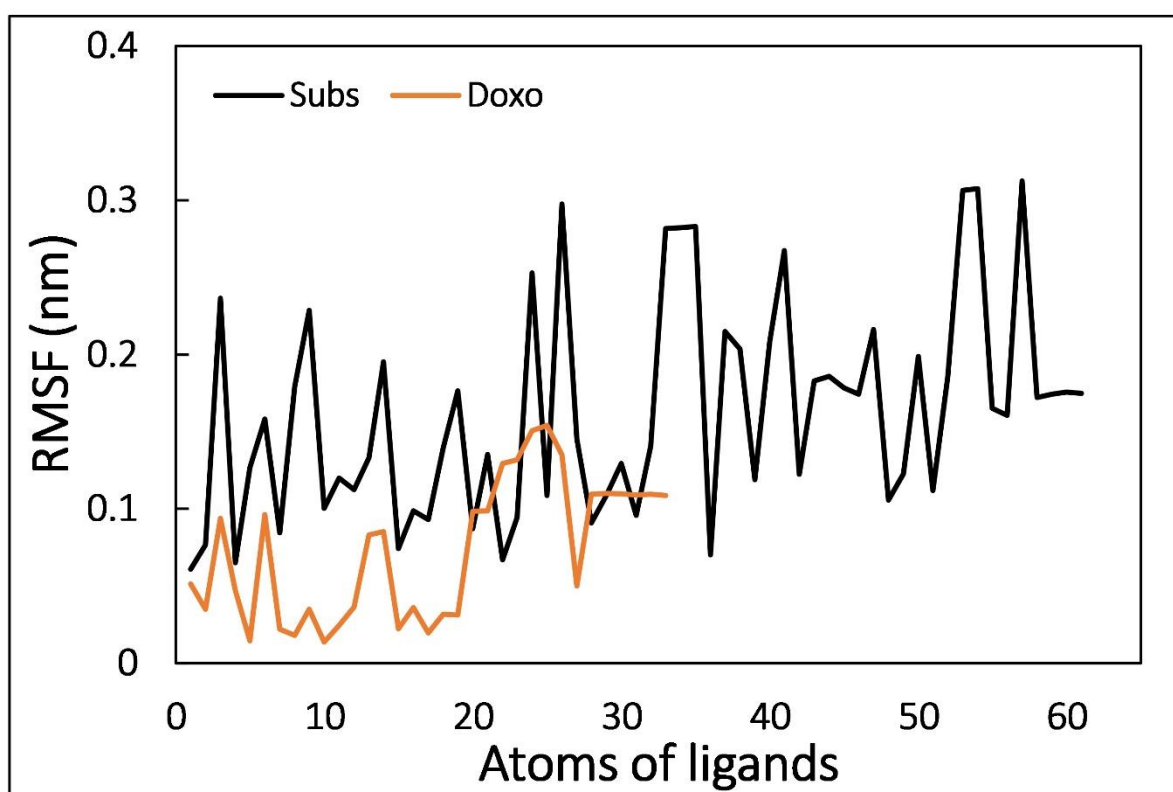

**Supplementary Figure S2.** Average RMSF of each atom of substrate and doxofylline. The RMSF is average of all frames of each trajectory.

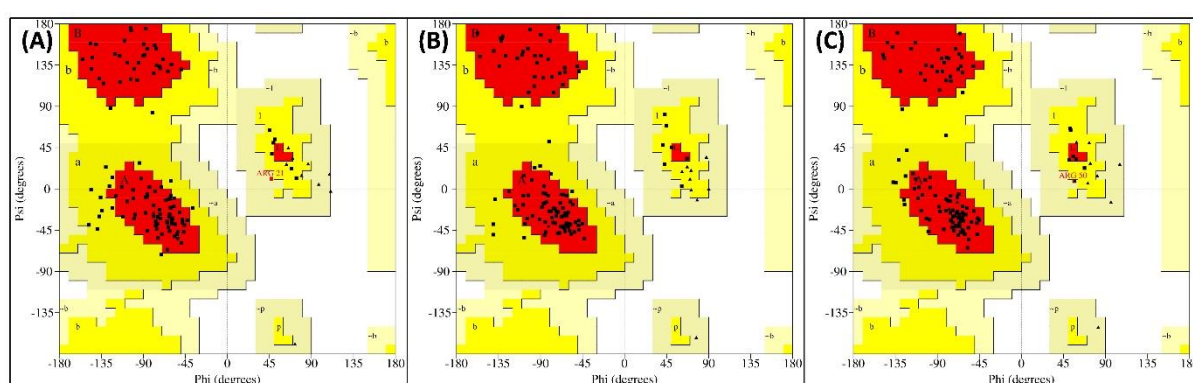

**Supplementary Figure S3.** (A) Ramachandran plot of energy minima structure of free lysozyme alone. (B) Ramachandran plot of energy minima structure of lysozyme-substrate complex. (C) Ramachandran plot of energy minima structure of lysozyme-doxofylline complex.

## Supplementary Table

**Supplementary Table S1.** Total binding energies ( $E_{\text{total}}$  is total energy) (kcal mol<sup>-1</sup>) of major energy contributors for the interaction of substrate and doxofylline with lysozyme calculated from MM-PBSA.

| Substrate |                                              | Doxofylline |                                              |
|-----------|----------------------------------------------|-------------|----------------------------------------------|
| Residues  | $E_{\text{total}}$ (kcal mol <sup>-1</sup> ) | Residues    | $E_{\text{total}}$ (kcal mol <sup>-1</sup> ) |
| Asn46     | -0.236±0.021                                 | Asn46       | -0.129±0.005                                 |
| Ile59     | -0.581±0.045                                 | Asp49       | -0.137±0.030                                 |
| Asn60     | -1.564±0.092                                 | Ile59       | -0.205±0.021                                 |
| Arg62     | -0.422±0.044                                 | Asn60       | -0.922±0.027                                 |
| Tyr63     | -2.154±0.087                                 | Arg62       | -0.131±0.022                                 |
| Trp64     | -0.872±0.044                                 | Tyr63       | -2.385±0.049                                 |
| Val99     | -0.262±0.047                                 | Trp64       | -0.614±0.044                                 |
| Arg107    | -0.607±0.071                                 | Asp67       | -0.122±0.009                                 |
| Ala108    | -0.558±0.057                                 | Val99       | -0.464±0.022                                 |
| Trp109    | -0.818±0.070                                 | Arg107      | -0.307±0.021                                 |
| Val110    | -0.376±0.054                                 | Ala108      | -1.212±0.055                                 |
|           |                                              | Trp109      | -1.255±0.044                                 |
|           |                                              | Val110      | -0.111±0.012                                 |
